# Supplementary material for: Taxes and front-of-package labels improve the healthiness of beverage and snack purchases: a randomized experimental marketplace
Source: PubMed Central journal article supplement (PMC6528263; doi:10.1186/s12966-019-0799-0), 2019-05-21
Supplement: 12966_2019_799_MOESM1_ESM.pdf [file 12966_2019_799_MOESM1_ESM.pdf]

Additional file 1

CONTENTS:

|                                                                                                                                              |          |
|----------------------------------------------------------------------------------------------------------------------------------------------|----------|
| <b>Figure S1</b> – Visual depiction of the purchasing tasks protocol in the experimental marketplace.....                                    | <b>1</b> |
| <b>Table S1</b> – Ratings/labels corresponding to label conditions for all beverage and food products included in the purchasing tasks ..... | <b>4</b> |
| <b>Table S2</b> – Prices corresponding to tax conditions for all beverage and food products included in the purchasing tasks .....           | <b>2</b> |
| <b>Table S3</b> – Nutrition information of all beverage and food products included in the purchasing tasks .....                             | <b>6</b> |

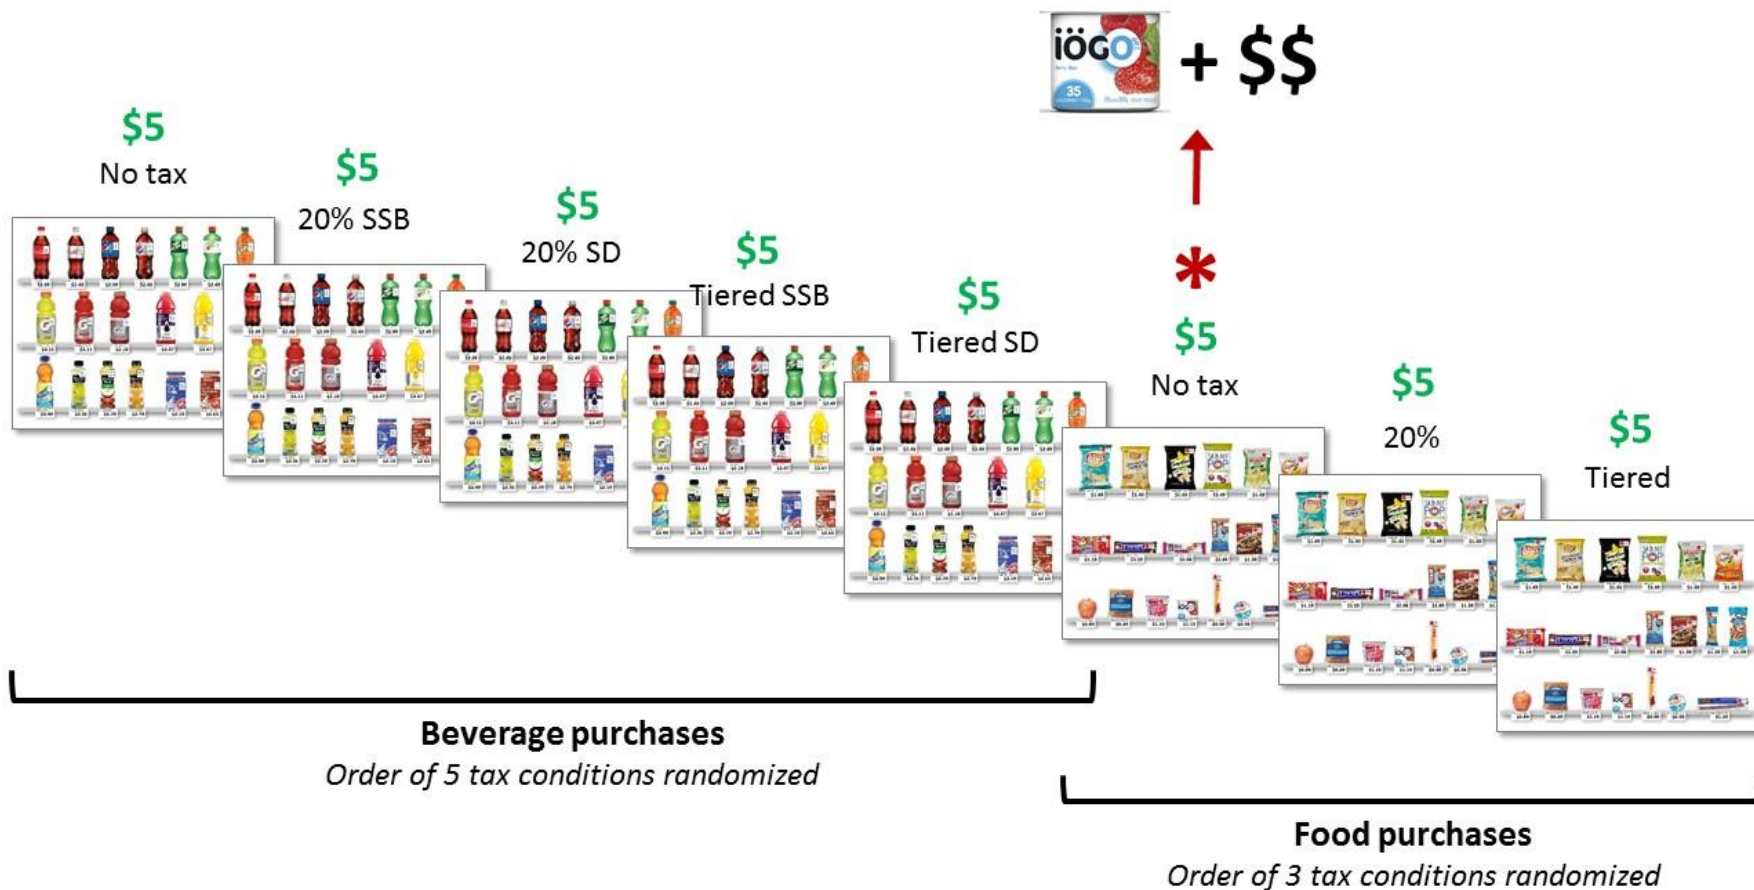

**Figure S1.** Visual depiction of the purchasing tasks protocol in the experimental marketplace. Each respondent completed 8 consecutive purchasing tasks, with one randomly assigned FOP labelling scheme applied to the products throughout all 8 tasks. The products available for purchase (first beverages, and then snack foods) were displayed to participants on large print-outs. A budget of \$5 was provided for each task. \*At the end of the experiment, the computer randomly selected one of the respondent's eight selections to be their real purchase, and the respondent was given the actual food or beverage item and any change from that task.

**Table S1.** Ratings/labels corresponding to label conditions for all beverage and food products included in the purchasing tasks

|                            |                                | <i>Sugar</i> | <b>High in</b><br><i>Sodium</i> | <i>Sat fat</i> | <i>Sugar</i> | <b>MTL</b><br><i>Sodium</i> | <i>Sat fat</i> | <b>Health star rating</b> | <b>Nutrition grade</b> |
|----------------------------|--------------------------------|--------------|---------------------------------|----------------|--------------|-----------------------------|----------------|---------------------------|------------------------|
| <b>Beverages</b>           |                                |              |                                 |                |              |                             |                |                           |                        |
| <i>Product</i>             | <i>Flavour/variety</i>         |              |                                 |                |              |                             |                |                           |                        |
| Coca Cola                  |                                | ●            |                                 |                | High         | Low                         | Low            | ★                         | E                      |
| Diet Coke                  |                                |              |                                 |                | Low          | Low                         | Low            | ★★                        | D                      |
| Pepsi                      |                                | ●            |                                 |                | High         | Low                         | Low            | ★                         | E                      |
| Diet Pepsi                 |                                |              |                                 |                | Low          | Low                         | Low            | ★★                        | D                      |
| 7-Up                       |                                | ●            |                                 |                | High         | Low                         | Low            | ★                         | E                      |
| Diet 7-Up                  |                                |              |                                 |                | Low          | Low                         | Low            | ★★                        | D                      |
| Orange Crush               |                                | ●            |                                 |                | High         | Low                         | Low            | ★                         | E                      |
| Gatorade Original          | Lemon-Lime                     | ●            |                                 |                | High         | Low                         | Low            | ★ 1/2                     | D                      |
| Gatorade Original          | Fruit Punch                    | ●            |                                 |                | High         | Low                         | Low            | ★ 1/2                     | D                      |
| Gatorade Low-Cal G2        | Fruit Punch                    |              |                                 |                | Low          | Low                         | Low            | ★★                        | D                      |
| VitaminWater               | XXX (berry-pomegranate)        | ●            |                                 |                | High         | Low                         | Low            | ★ 1/2                     | D                      |
| VitaminWater               | Energy (tropical citrus)       | ●            |                                 |                | High         | Low                         | Low            | ★ 1/2                     | D                      |
| VitaminWater ZERO          | XOXOX (diet berry-pomegranate) |              |                                 |                | Low          | Low                         | Low            | ★★                        | D                      |
| Nestea Lemon Iced Tea      |                                | ●            |                                 |                | High         | Low                         | Low            | ★ 1/2                     | D                      |
| Minute Maid Lemonade       |                                | ●            |                                 |                | High         | Low                         | Low            | ★ 1/2                     | D                      |
| Minute Maid Apple Juice    |                                | ●            |                                 |                | High         | Low                         | Low            | ★★★★★                     | A                      |
| Minute Maid Orange Juice   |                                | ●            |                                 |                | High         | Low                         | Low            | ★★★★★                     | A                      |
| Neilson 2% White Milk      |                                |              |                                 | ●              | Medium       | Low                         | High           | ★★★★ 1/2                  | A                      |
| Neilson 1% Chocolate Milk  |                                | ●            |                                 |                | High         | Low                         | Low            | ★★★★                      | B                      |
| Real Canadian Spring Water |                                |              |                                 |                | Low          | Low                         | Low            | ★★★★★                     | A                      |
| <b>Foods</b>               |                                |              |                                 |                |              |                             |                |                           |                        |
| <i>Product</i>             | <i>Flavour/variety</i>         |              |                                 |                |              |                             |                |                           |                        |
| Potato chips               | Lay's Salt & Vinegar           |              | ●                               |                | Low          | High                        | Medium         | ★★ 1/2                    | C                      |
| Potato chips               | Lay's Oven Baked Original      |              |                                 |                | Medium       | Medium                      | Medium         | ★★★★                      | B                      |
| Popcorn                    | Smartfood White Cheddar        |              | ●                               | ●              | Low          | High                        | High           | ★★                        | D                      |

|                    |                                  |     |     |     |        |        |        |         |     |
|--------------------|----------------------------------|-----|-----|-----|--------|--------|--------|---------|-----|
| Popcorn            | Skinny Pop                       |     |     |     | Low    | Medium | Medium | ★★★★    | B   |
| Crackers/snack     | Garden Veggie Straws             |     | ●   |     | Low    | High   | Medium | ★★1/2   | C   |
| Crackers/snack     | Cheddar Goldfish                 |     | ●   |     | Low    | High   | Medium | ★★      | D   |
| Candy gummies      | Maynards Gummy Bears             | ●   |     |     | High   | Low    | Low    | ★★      | D   |
| Chocolate bar      | Snickers                         | ●   |     | ●   | High   | Medium | High   | ★       | E   |
| Granola/cereal bar | Quaker Chewy Yogurt Bars         | ●   |     | ●   | High   | Medium | High   | ★1/2    | D   |
| Power/energy bar   | Clif Energy Bar Chocolate Chip   | ●   |     |     | High   | Medium | Medium | ★★1/2   | C   |
| Cookies            | Mrs. Fields                      | ●   |     | ●   | High   | Medium | High   | ★       | E   |
| Nuts               | Planters Salted Peanuts          |     |     | ●   | Low    | Medium | High   | ★★★★    | B   |
| Nuts               | Blue Diamond Salted Almonds      |     |     |     | Low    | Medium | Medium | ★★★★★   | A   |
| Fresh fruit        | Apple                            | N/A | N/A | N/A | N/A    | N/A    | N/A    | N/A     | N/A |
| Fresh vegetable    | Baby Carrots Snack Pack          | N/A | N/A | N/A | N/A    | N/A    | N/A    | N/A     | N/A |
| Yogurt             | Beatrice Strawberry Fruit Bottom | ●   |     | ●   | High   | Low    | High   | ★★1/2   | C   |
| Yogurt             | lōgo Fat Free Berry              |     |     |     | Low    | Low    | Low    | ★★★★1/2 | A   |
| Cheese snack       | Marbelicious Cheestrings         |     | ●   | ●   | Low    | High   | High   | ★★★★★   | A   |
| Cheese snack       | Mini-Babybel, Light              |     | ●   | ●   | Low    | High   | High   | ★★★★★   | A   |
| Meat snack         | Schneiders Hot Rods              |     | ●   | ●   | Medium | High   | High   | 1/2     | E   |

**Table S2.** Prices corresponding to tax conditions for all beverage and food products included in the purchasing tasks

|                            |                                | Tax Conditions |                      |                     |                         |                        |
|----------------------------|--------------------------------|----------------|----------------------|---------------------|-------------------------|------------------------|
|                            |                                | No tax         | 20% SSB <sup>a</sup> | 20% SD <sup>b</sup> | Tiered SSB <sup>c</sup> | Tiered SD <sup>d</sup> |
| <b>Beverages</b>           |                                |                |                      |                     |                         |                        |
| <i>Product</i>             | <i>Flavour/variety</i>         |                |                      |                     |                         |                        |
| Coca Cola                  |                                | \$ 2.49        | \$ 2.99 *            | \$ 2.99 *           | \$ 2.99 *               | \$ 2.99 *              |
| Diet Coke                  |                                | \$ 2.49        | \$ 2.49              | \$ 2.49             | \$ 2.49                 | \$ 2.49                |
| Pepsi                      |                                | \$ 2.49        | \$ 2.99 *            | \$ 2.99 *           | \$ 2.99 *               | \$ 2.99 *              |
| Diet Pepsi                 |                                | \$ 2.49        | \$ 2.49              | \$ 2.49             | \$ 2.49                 | \$ 2.49                |
| 7-Up                       |                                | \$ 2.49        | \$ 2.99 *            | \$ 2.99 *           | \$ 2.99 *               | \$ 2.99 *              |
| Diet 7-Up                  |                                | \$ 2.49        | \$ 2.49              | \$ 2.49             | \$ 2.49                 | \$ 2.49                |
| Orange Crush               |                                | \$ 2.49        | \$ 2.99 *            | \$ 2.99 *           | \$ 2.99 *               | \$ 2.99 *              |
| Gatorade Original          | Lemon-Lime                     | \$ 2.59        | \$ 3.11 *            | \$ 3.11 *           | \$ 2.85 *               | \$ 2.85 *              |
| Gatorade Original          | Fruit Punch                    | \$ 2.59        | \$ 3.11 *            | \$ 3.11 *           | \$ 2.85 *               | \$ 2.85 *              |
| Gatorade Low-Cal G2        | Fruit Punch                    | \$ 2.59        | \$ 2.59              | \$ 2.59             | \$ 2.59                 | \$ 2.59                |
| VitaminWater               | XXX (berry-pomegranate)        | \$ 2.89        | \$ 3.47 *            | \$ 3.47 *           | \$ 3.18 *               | \$ 3.18 *              |
| VitaminWater               | Energy (tropical citrus)       | \$ 2.89        | \$ 3.47 *            | \$ 3.47 *           | \$ 3.18 *               | \$ 3.18 *              |
| VitaminWater ZERO          | XOXOX (diet berry-pomegranate) | \$ 2.89        | \$ 2.89              | \$ 2.89             | \$ 2.89                 | \$ 2.89                |
| Nestea Lemon Iced Tea      |                                | \$ 2.49        | \$ 2.99 *            | \$ 2.99 *           | \$ 2.99 *               | \$ 2.99 *              |
| Minute Maid Lemonade       |                                | \$ 2.79        | \$ 3.35 *            | \$ 3.35 *           | \$ 3.35 *               | \$ 3.35 *              |
| Minute Maid Apple Juice    |                                | \$ 2.79        | \$ 2.79              | \$ 3.35 *           | \$ 2.79                 | \$ 3.35 *              |
| Minute Maid Orange Juice   |                                | \$ 2.79        | \$ 2.79              | \$ 3.35 *           | \$ 2.79                 | \$ 3.35 *              |
| Neilson 2% White Milk      |                                | \$ 2.19        | \$ 2.19              | \$ 2.19             | \$ 2.19                 | \$ 2.19                |
| Neilson 1% Chocolate Milk  |                                | \$ 2.19        | \$ 2.63 *            | \$ 2.63 *           | \$ 2.63 *               | \$ 2.63 *              |
| Real Canadian Spring Water |                                | \$ 1.69        | \$ 1.69              | \$ 1.69             | \$ 1.69                 | \$ 1.69                |
| <b>Foods</b>               |                                |                |                      |                     |                         |                        |
| <i>Product</i>             | <i>Flavour/variety</i>         | No tax         | 20%                  |                     | Tiered                  |                        |
| Potato chips               | Lay's Salt & Vinegar           | \$ 1.49        | \$ 1.49              |                     | \$ 1.49                 |                        |
| Potato chips               | Lay's Oven Baked Original      | \$ 1.49        | \$ 1.49              |                     | \$ 1.49                 |                        |
| Popcorn                    | Smartfood White Cheddar        | \$ 1.49        | \$ 1.49              |                     | \$ 1.49                 |                        |

|                    |                                  |         |           |           |
|--------------------|----------------------------------|---------|-----------|-----------|
| Popcorn            | Skinny Pop                       | \$ 1.49 | \$ 1.49   | \$ 1.49   |
| Crackers/snack     | Garden Veggie Straws             | \$ 1.49 | \$ 1.49   | \$ 1.49   |
| Crackers/snack     | Cheddar Goldfish                 | \$ 1.49 | \$ 1.49   | \$ 1.49   |
| Candy gummies      | Maynards Gummy Bears             | \$ 1.19 | \$ 1.43 * | \$ 1.43 * |
| Chocolate bar      | Snickers                         | \$ 1.19 | \$ 1.43 * | \$ 1.43 * |
| Granola/cereal bar | Quaker Chewy Yogurt Bars         | \$ 0.98 | \$ 1.18 * | \$ 1.18 * |
| Power/energy bar   | Clif Energy Bar Chocolate Chip   | \$ 1.89 | \$ 2.27 * | \$ 2.27 * |
| Cookies            | Mrs. Fields                      | \$ 1.39 | \$ 1.67 * | \$ 1.67 * |
| Nuts               | Planters Salted Peanuts          | \$ 1.29 | \$ 1.29   | \$ 1.29   |
| Nuts               | Blue Diamond Salted Almonds      | \$ 1.29 | \$ 1.29   | \$ 1.29   |
| Fresh fruit        | Apple                            | \$ 0.89 | \$ 0.89   | \$ 0.89   |
| Fresh vegetable    | Baby Carrots Snack Pack          | \$ 0.89 | \$ 0.89   | \$ 0.89   |
| Yogurt             | Beatrice Strawberry Fruit Bottom | \$ 1.19 | \$ 1.43 * | \$ 1.31 * |
| Yogurt             | lögo Fat Free Berry              | \$ 1.19 | \$ 1.19   | \$ 1.19   |
| Cheese snack       | Marbelicious Cheestrings         | \$ 0.98 | \$ 0.98   | \$ 0.98   |
| Cheese snack       | Mini-Babybel, Light              | \$ 0.98 | \$ 0.98   | \$ 0.98   |
| Meat snack         | Schneiders Hot Rods              | \$ 1.29 | \$ 1.29   | \$ 1.29   |

<sup>a</sup> Beverages containing > 5 g of *added sugar* per 100 ml were assigned a 20% tax.

<sup>b</sup> Beverages containing > 5 g of *free sugar* per 100 ml were assigned a 20% tax.

<sup>c</sup> Beverages containing > 5 g *added sugar* per 100 ml were assigned a 10% tax; beverages containing > 8 g of *added sugar* per 100 ml were assigned a 20% tax.

<sup>d</sup> Beverages containing > 5 g *free sugar* per 100 ml were assigned a 10% tax; beverages containing > 8 g of *free sugar* per 100 ml were assigned a 20% tax.

<sup>e</sup> Foods containing > 10 g total sugar per 100 g were assigned a 20% tax.

<sup>f</sup> Foods containing > 10 g total sugar per 100 g were assigned a 10% tax; foods containing > 20 g total sugar per 100 g were assigned a 20% tax.

\* Tax applies.

**Table S3.** Nutrition information of all beverage and food products included in the purchasing tasks

|                            |                                | Serving<br>volume<br>(mL) | Calories<br>(kcal) | Sugar<br>(g) | Sodium<br>(mg) | Saturated<br>fat<br>(g) |
|----------------------------|--------------------------------|---------------------------|--------------------|--------------|----------------|-------------------------|
| <b>Beverages</b>           |                                |                           |                    |              |                |                         |
| <i>Product</i>             | <i>Flavour/variety</i>         |                           |                    |              |                |                         |
| Coca Cola                  |                                | 500                       | 200                | 55           | 40             | 0                       |
| Diet Coke                  |                                | 500                       | 0                  | 0            | 55             | 0                       |
| Pepsi                      |                                | 591                       | 260                | 69           | 20             | 0                       |
| Diet Pepsi                 |                                | 591                       | 0                  | 0            | 40             | 0                       |
| 7-Up                       |                                | 591                       | 260                | 70           | 100            | 0                       |
| Diet 7-Up                  |                                | 591                       | 5                  | 0            | 100            | 0                       |
| Orange Crush               |                                | 591                       | 270                | 71           | 120            | 0                       |
| Gatorade Original          | Lemon-Lime                     | 591                       | 150                | 35           | 250            | 0                       |
| Gatorade Original          | Fruit Punch                    | 591                       | 150                | 35           | 250            | 0                       |
| Gatorade Low-Cal G2        | Fruit Punch                    | 591                       | 50                 | 12           | 270            | 0                       |
| VitaminWater               | XXX (berry-pomegranate)        | 591                       | 130                | 32           | 0              | 0                       |
| VitaminWater               | Energy (tropical citrus)       | 591                       | 120                | 32           | 0              | 0                       |
| VitaminWater ZERO          | XOXOX (diet berry-pomegranate) | 591                       | 0                  | 1            | 0              | 0                       |
| Nestea Lemon Iced Tea      |                                | 500                       | 160                | 43           | 50             | 0                       |
| Minute Maid Lemonade       |                                | 450                       | 200                | 52           | 30             | 0                       |
| Minute Maid Apple Juice    |                                | 450                       | 210                | 48           | 40             | 0                       |
| Minute Maid Orange Juice   |                                | 450                       | 220                | 45           | 30             | 0                       |
| Neilson 2% White Milk      |                                | 250                       | 130                | 12           | 120            | 3                       |
| Neilson 1% Chocolate Milk  |                                | 250                       | 160                | 26           | 170            | 2                       |
| Real Canadian Spring Water |                                | 500                       | 0                  | 0            | 0              | 0                       |
| <b>Foods</b>               |                                |                           |                    |              |                |                         |
| <i>Product</i>             | <i>Flavour/variety</i>         |                           |                    |              |                |                         |
| Potato chips               | Lay's Salt & Vinegar           | 60                        | 320                | 1            | 530            | 2                       |
| Potato chips               | Lay's Oven Baked Original      | 32                        | 150                | 3            | 180            | 0.5                     |
| Popcorn                    | Smartfood White Cheddar        | 45                        | 250                | 2            | 370            | 3                       |
| Popcorn                    | Skinny Pop                     | 18                        | 100                | 0            | 45             | 0.5                     |

|                    |                                  |     |     |    |     |     |
|--------------------|----------------------------------|-----|-----|----|-----|-----|
| Crackers/snack     | Garden Veggie Straws             | 28  | 130 | 1  | 210 | 1   |
| Crackers/snack     | Cheddar Goldfish                 | 28  | 130 | 0  | 230 | 1   |
| Candy gummies      | Maynards Gummy Bears             | 60  | 200 | 32 | 35  | 0   |
| Chocolate bar      | Snickers                         | 47  | 220 | 24 | 115 | 4   |
| Granola/cereal bar | Quaker Chewy Yogurt Bars         | 35  | 150 | 11 | 115 | 2.5 |
| Power/energy bar   | Clif Energy Bar Chocolate Chip   | 68  | 250 | 21 | 150 | 1.5 |
| Cookies            | Mrs. Fields                      | 60  | 270 | 24 | 230 | 5   |
| Nuts               | Planters Salted Peanuts          | 60  | 390 | 3  | 180 | 6   |
| Nuts               | Blue Diamond Salted Almonds      | 23  | 140 | 1  | 70  | 1   |
| Fresh fruit        | Apple                            | 150 | 80  | 16 | 0   | 0   |
| Fresh vegetable    | Baby Carrots Snack Pack          | 65  | 25  | 4  | 30  | 0   |
| Yogurt             | Beatrice Strawberry Fruit Bottom | 175 | 170 | 25 | 100 | 3   |
| Yogurt             | lögo Fat Free Berry              | 100 | 35  | 3  | 45  | 0   |
| Cheese snack       | Marbelicious Cheestrings         | 21  | 60  | 0  | 150 | 2   |
| Cheese snack       | Mini-Babybel, Light              | 20  | 45  | 0  | 140 | 1.5 |
| Meat snack         | Schneiders Hot Rods              | 19  | 105 | 1  | 375 | 4   |
